# Supplementary material for: Unique Pattern of Component Gene Disruption in the NRF2 Inhibitor KEAP1/CUL3/RBX1 E3-Ubiquitin Ligase Complex in Serous Ovarian Cancer
Source: Hindawi journal article supplement (doi:10.1155/2014/159459), 2014-01-01

**A**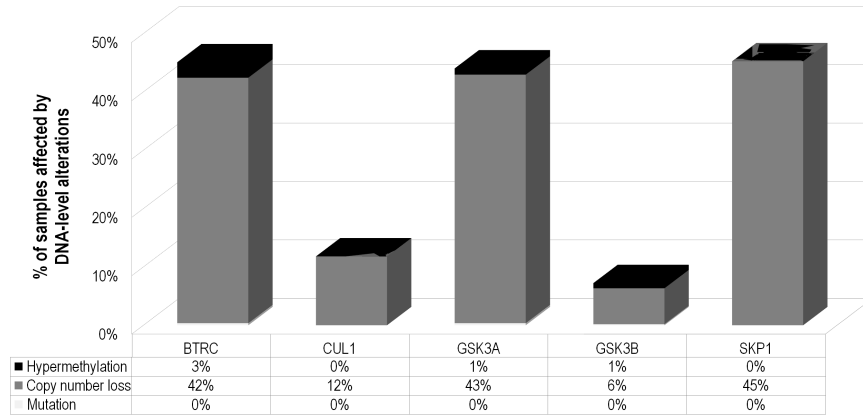**B**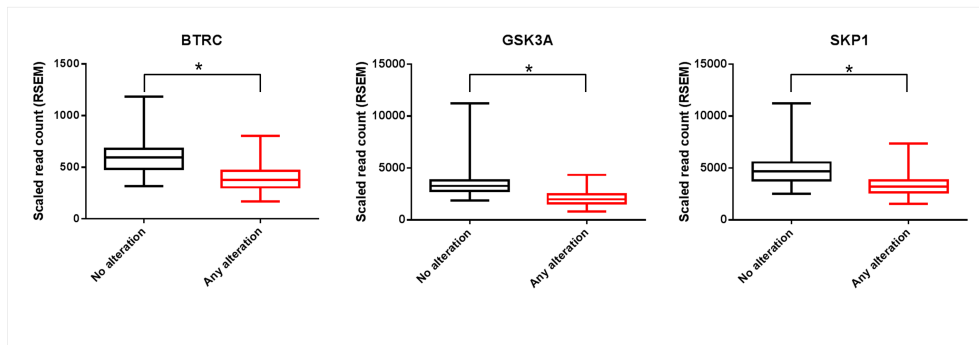

Supplement: f1 [file 159459.f1.pdf]
